# Supplementary material for: Enhancing the intracellular delivery of antisense oligonucleotides (ASO) : a comparative study of aptamer, vitamin E, and cholesterol ASO conjugates
Source: Royal Society of Chemistry journal article supplement (doi:10.1039/d5ra05904f), 2025-01-01

## Supplementary information

| Sequence Information                                                                             |                                                                                                                                                   |
|--------------------------------------------------------------------------------------------------|---------------------------------------------------------------------------------------------------------------------------------------------------|
| Sequence Name:                                                                                   | PNAT524_NCL                                                                                                                                       |
| Sequence(5'-3'):                                                                                 | FAM/mA*mC*mC*mA*mG*mC*mC*mA*mC*mC*mU*mC*mC*mU*mG*mG*mA*mU*mG*mG*mU*mC*mU*mA*mA*/Thiol C6 S-S/dGdGdTdGdGdTdGdGdTdGdGdTdGdTdGdTdGdGdTdGdGdTdGdG/Cy3 |
| Number of Bases : 51   Scale : 1umol   Chemistry : Mixed   Linkage : Mixed   Purification : HPLC |                                                                                                                                                   |
| Amount of Oligo                                                                                  | Molecular Weight                                                                                                                                  |
| OD260:                                                                                           | 76.20                                                                                                                                             |
| Extinction Coefficient:                                                                          | 537500 L/(mole.cm)                                                                                                                                |
| Number of nmoles:                                                                                | 141.77                                                                                                                                            |
| Amount in mg:                                                                                    | 2.54                                                                                                                                              |
| For 100 µM Concentration : Add 1417.67 µL                                                        |                                                                                                                                                   |
| Charts & Notes                                                                                   |                                                                                                                                                   |

### MALDI TOF :

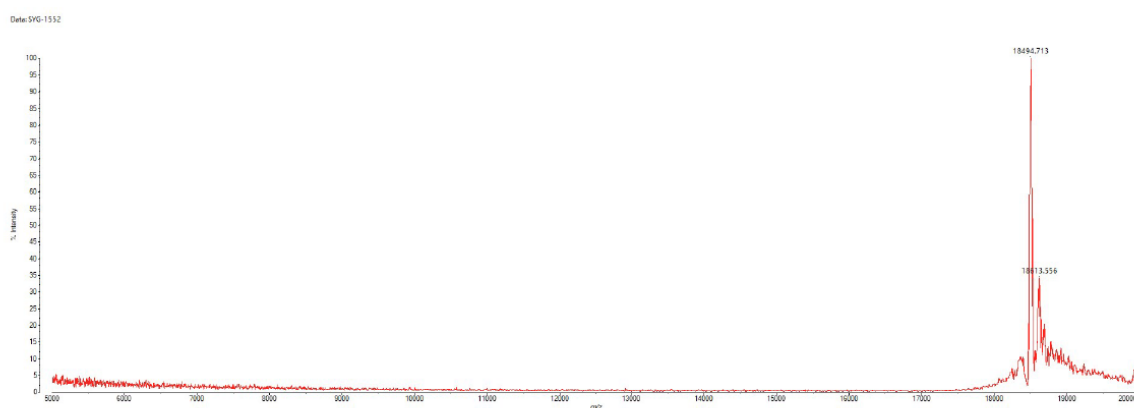

### HPLC :

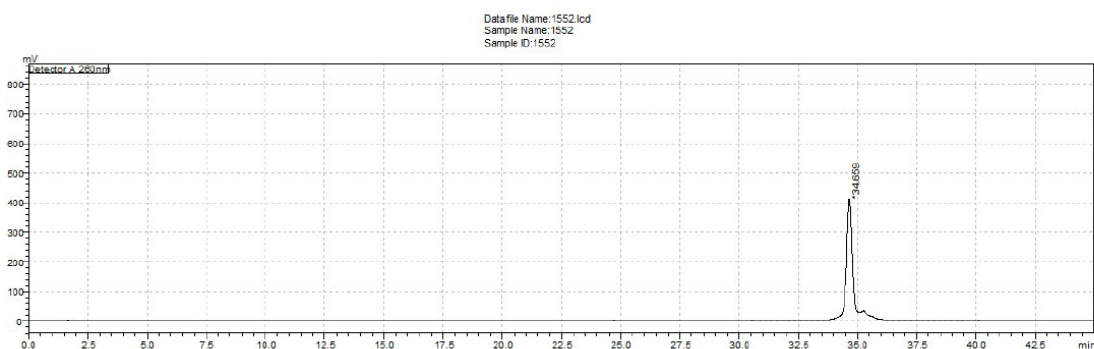

| Sequence Information                                                                             |                                                                                                                                             |
|--------------------------------------------------------------------------------------------------|---------------------------------------------------------------------------------------------------------------------------------------------|
| Sequence Name:                                                                                   | PNAT524_S2.2                                                                                                                                |
| Sequence (5'-3'):                                                                                | /FAM/mA*mC*mC*mA*mG*mC*mC*mA*mC*mC*mU*mC*mC*mU*mG*mG*mA*mU*mG*mG*mU*mC*mU*mA*mA/TEG/dGdCdAdGdTdTdGdAdTdCdCdTdTdTdGdGdAdTdAdCdCdCdTdGdG/Cy3/ |
| Number of Bases : 50   Scale : 1umol   Chemistry : Mixed   Linkage : Mixed   Purification : HPLC |                                                                                                                                             |
| Amount of Oligo                                                                                  | Molecular Weight                                                                                                                            |
| OD260:                                                                                           | 89.10                                                                                                                                       |
| Extinction Coefficient:                                                                          | 547900 L/(mole.cm)                                                                                                                          |
| nmol/ml:                                                                                         | 162.62                                                                                                                                      |
| Amount in mg:                                                                                    | 2.88                                                                                                                                        |
| For 100 µM Concentration : Add 1626.21 µL                                                        |                                                                                                                                             |
| Charts & Notes                                                                                   |                                                                                                                                             |

MALDI TOF :

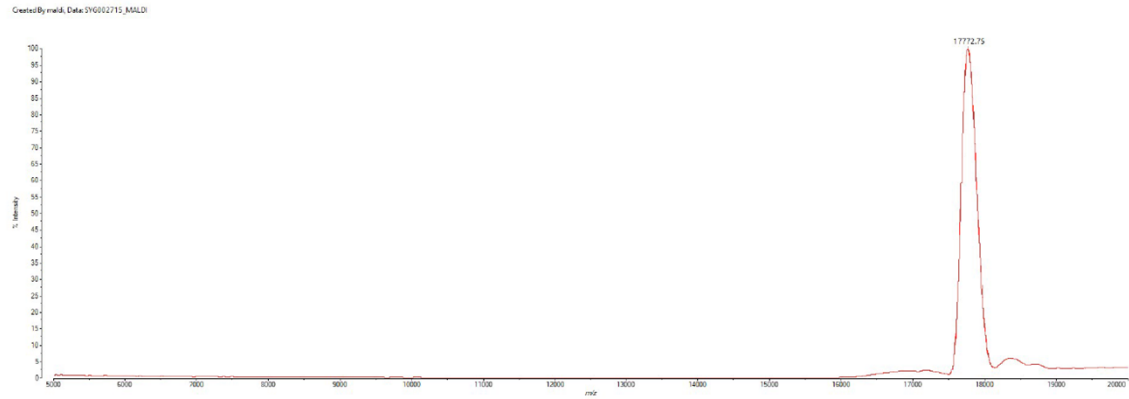

HPLC :

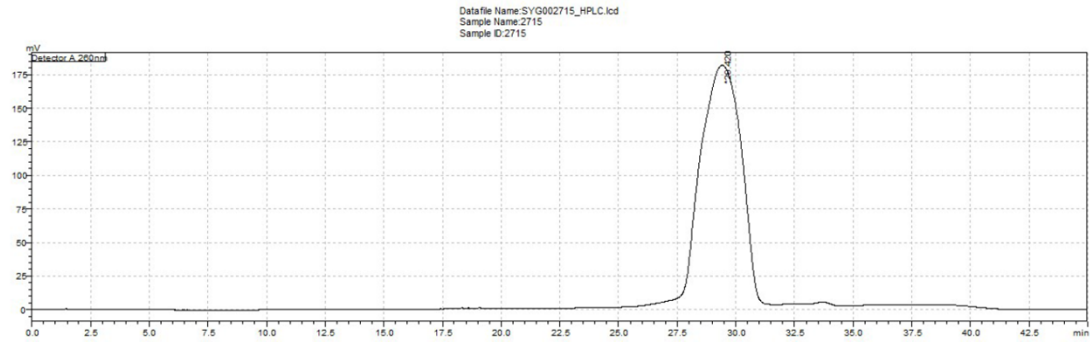

| Sequence Information                                                                          |                                                                                                 |
|-----------------------------------------------------------------------------------------------|-------------------------------------------------------------------------------------------------|
| Sequence Name:                                                                                | PNAT524_VitE                                                                                    |
| Sequence(5'-3'):                                                                              | FAM/mA*mC*mC*mA*mG*mC*mC*mA*mC*mU*mC*mC*mU*mG*mG*mA*mU*mG*mC*mU* mC*mU*mA*mA*/Thiol C6 S-S/VitE |
| Number of Bases : 25   Scale : 1umol   Chemistry : 2'OMe   Linkage : PS   Purification : HPLC |                                                                                                 |
| Amount of Oligo                                                                               | Molecular Weight                                                                                |
| OD260:                                                                                        | 52.50                                                                                           |
| Extinction Coefficient:                                                                       | 278300 L/(mole.cm)                                                                              |
| Number of nmoles:                                                                             | 188.65                                                                                          |
| Amount in mg:                                                                                 | 1.94                                                                                            |
| For 100 µM Concentration : Add 1886.45 µL                                                     |                                                                                                 |
| Charts & Notes                                                                                |                                                                                                 |

MALDI TOF :

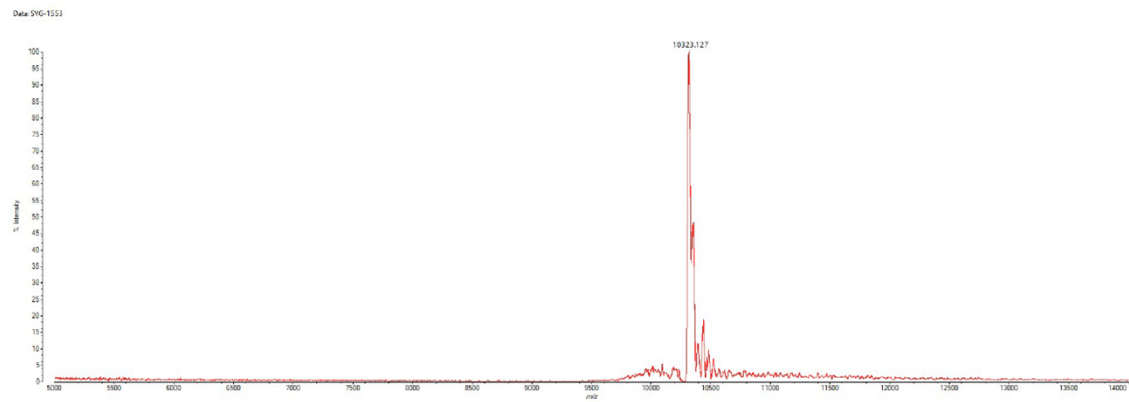

HPLC :

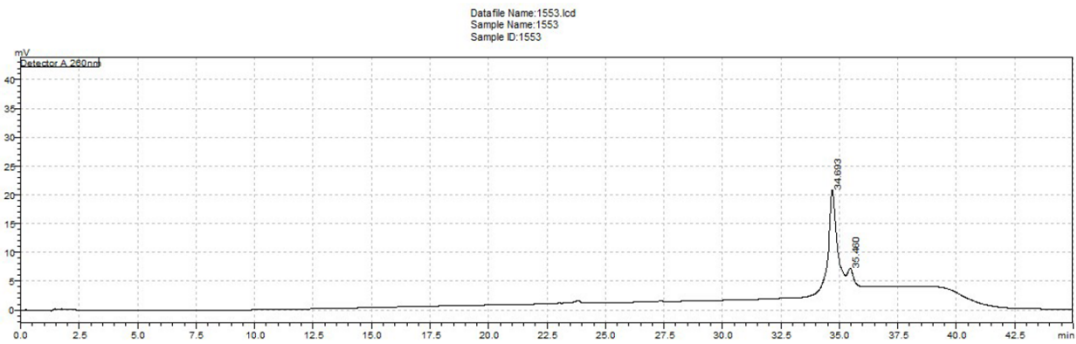

| Sequence Information                                                                          |                                                                                                           |
|-----------------------------------------------------------------------------------------------|-----------------------------------------------------------------------------------------------------------|
| Sequence Name:                                                                                | PNAT524_cholesterol                                                                                       |
| Sequence(5'-3'):                                                                              | FAM/mA*mC*mC*mA*mG*mC*mC*mA*mC*mC*mU*mC*mC*mU*mG*mG*mA*mU*mG*mG*mU* mC*mU*mA*mA*/Thiol C6 S-S/Cholesterol |
| Number of Bases : 25   Scale : 1umol   Chemistry : 2'OMe   Linkage : PS   Purification : HPLC |                                                                                                           |
| Amount of Oligo                                                                               | Molecular Weight                                                                                          |
| OD260:                                                                                        | 49.05                                                                                                     |
| Extinction Coefficient:                                                                       | 278300 L/(mole.cm)                                                                                        |
| Number of nmoles:                                                                             | 176.25                                                                                                    |
| Amount in mg:                                                                                 | 1.82                                                                                                      |
| For 100 µM Concentration : Add 1762.49 µL                                                     |                                                                                                           |
| Charts & Notes                                                                                |                                                                                                           |

MALDI TOF :

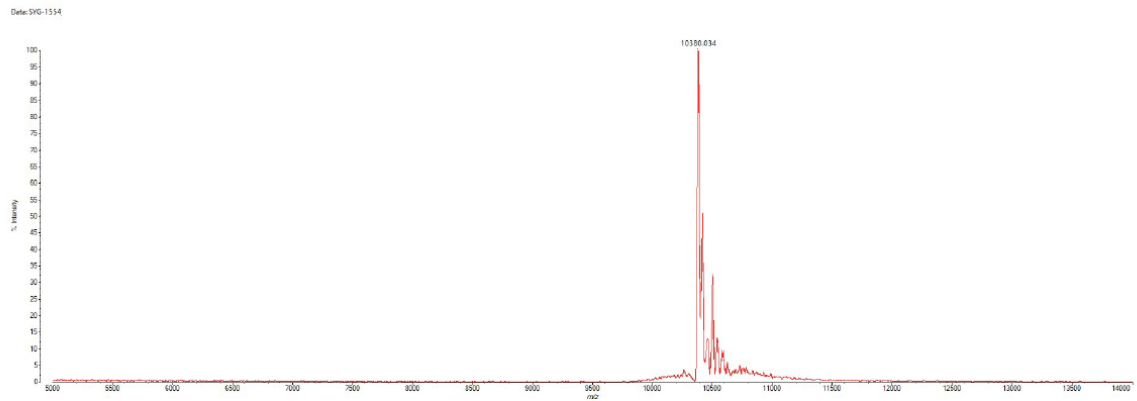

HPLC :

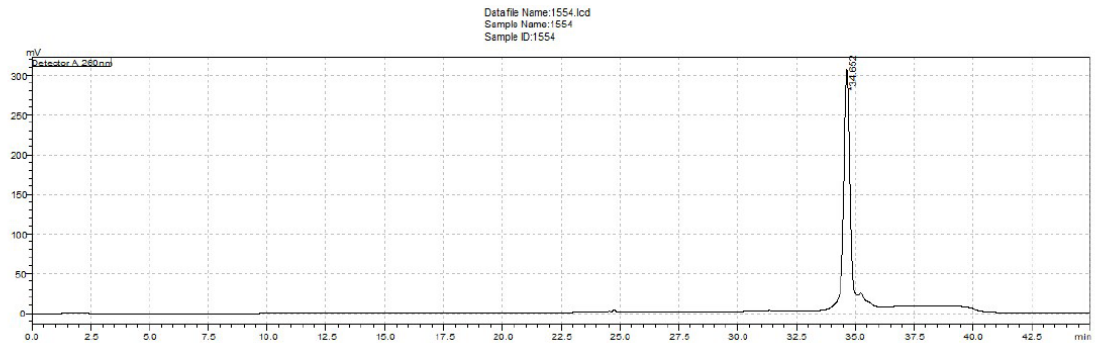

| Sequence Information                                                                                         |                        |
|--------------------------------------------------------------------------------------------------------------|------------------------|
| Sequence Name:                                                                                               | PNAT524_cholesterol_NL |
| Sequence (5'-3'): FAM/mA*mC*mC*mA*mG*mC*mC*mA*mC*mC*mU*mC*mC*mU*mG*mG*mA*mU*mG*mG*mU*mC*mU*mA*mA/Cholesterol |                        |
| Number of Bases : 25   Scale : 1µmol   Chemistry : 2'OME   Linkage : PS   Purification : HPLC                |                        |
| Amount of Oligo                                                                                              | Molecular Weight       |
| OD260:                                                                                                       | 11.70                  |
| Extinction Coefficient:                                                                                      | 286900 L/(mole.cm)     |
| nmol/ml:                                                                                                     | 40.78                  |
| Amount in mg:                                                                                                | 0.41                   |
| For 100 µM Concentration : Add 407.81µL                                                                      |                        |

Charts & Notes

MALDI TOF :

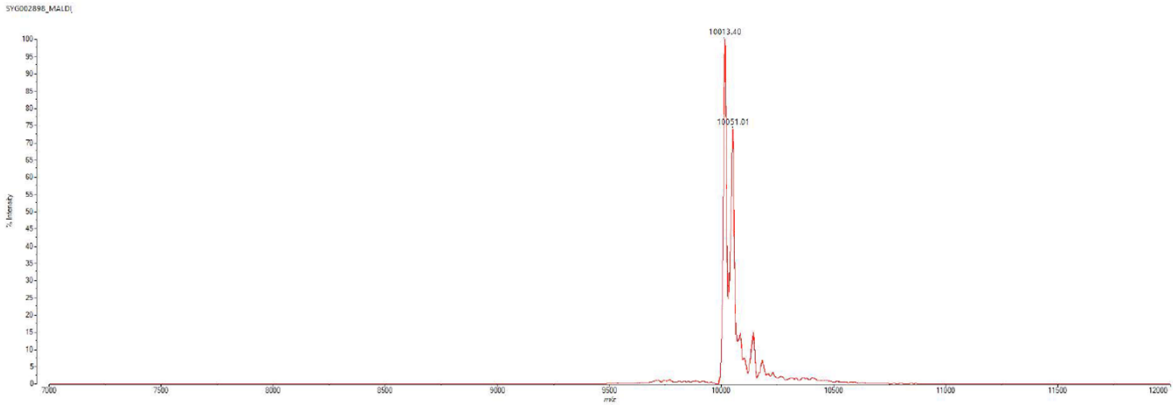

HPLC :

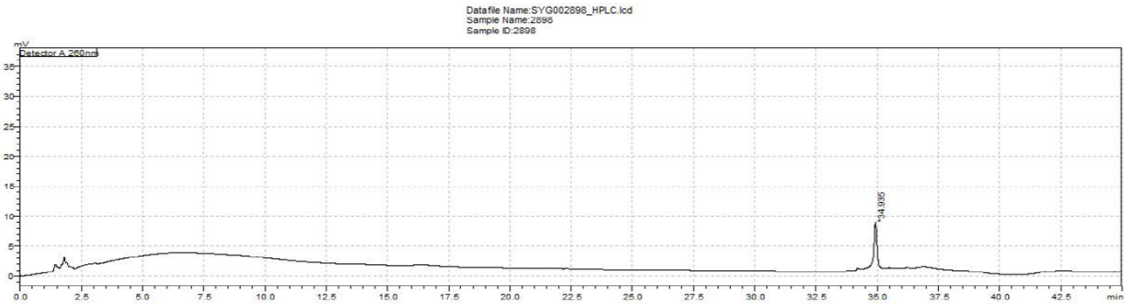

| Sequence Information                                                                                         |                    |                         |
|--------------------------------------------------------------------------------------------------------------|--------------------|-------------------------|
| Sequence Name: SCR524_cholesterol                                                                            |                    |                         |
| Sequence (5'–3'): mU*mU*mA*mG*mA*mC*mC*mA*mU*mC*mC*mA*mG*mG*mA*mG*mG*mU*mG*mG*mC*mU*mG*mC*mU-S-S/Cholesterol |                    |                         |
| Number of Bases : 25   Scale : 1µmol   Chemistry : 2'OME   Linkage : PS   Purification : HPLC                |                    |                         |
| Amount of Oligo                                                                                              |                    | Molecular Weight        |
| OD260:                                                                                                       | 20.25              | Calculated: 9888.25 Da  |
| Extinction Coefficient:                                                                                      | 276900 L/(mole.cm) |                         |
| nmol/ml:                                                                                                     | 73.13              | Found: 9912.28 (+Na) Da |
| Amount in mg:                                                                                                | 0.72               |                         |
| For 100 µM Concentration : Add 731.31µL                                                                      |                    |                         |
| Charts & Notes                                                                                               |                    |                         |

MALDI TOF :

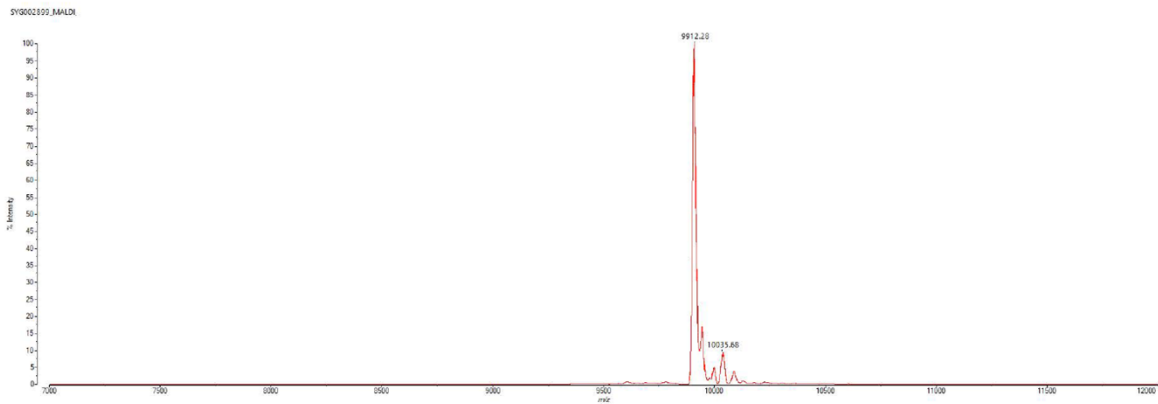

HPLC :

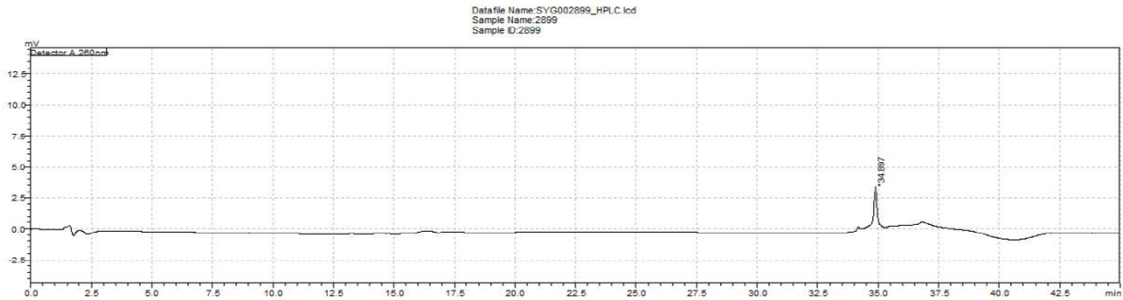

Supplement: d5ra05904f1.pdf [file d5ra05904f1.pdf]
